# Supplementary material for: Comparison between a Luminex-based multiplex kit with a sequence-specific oligonucleotide probe and next-generation sequencing for the detection of POLE oncogenic mutations in endometrial cancer
Source: Research Square preprint supplement (doi:10.21203/rs.3.rs-5540131/v1), 2024-12-10
Supplement: Supplementary file 1 [file 54cc0d1ead911ff47e0d7b2a.xlsx]

## Sheet: Supplementary table 1
	Supplementary Table 1. genotyping performance of the Luminex assay and Next generation sequencing
	Platform		Next generation sequencing (Ion AmpliSeq Custom Targeted NGS Testing Panels)
		Amino acid changed	P286R	S297F	P286C	S297Y	F367C	V411L	P436R	M444K	A426V	A456P	S459F	S459del	A465V
	Luminex assay	P286R	16
		S297F		3
		P286C			1
		S297Y				1
		F367C					1
		V411L						12
		P436R							3
		M444K								1
		A426V									1
		A456P										9
		S459F											2
		S459del												1
		A465V													1
	All of mutational data obtained by Luminex assay was identical to those data by Next generation sequencing.
