# Supplementary material for: Comparison between a Luminex-based multiplex kit with a sequence-specific oligonucleotide probe and next-generation sequencing for the detection of POLE oncogenic mutations in endometrial cancer
Source: Research Square preprint supplement (doi:10.21203/rs.3.rs-5540131/v1), 2024-12-10
Supplement: Supplementary file 2 [file e4fd8719413069daae776ce8.xlsx]

## Sheet: Supplementary table 2
	Supplementary Table 2. Primer sequences for Sanger sequencing
	Exon	Forward / reverse primer	Sequence (5'-3')
	9	Forward	CTAATGGGGAGTTTAGAGCTTGGC
		Reverse	GCACTCAACAAATACTAACAGTGGG
	11	Forward	GAGCAGACCTCTGACTGC
		Reverse	GGAGGTGCAGAGTGAACC
	12	Forward	CGACTTAGGAGGTGGCTCC
		Reverse	GAGGCAGTCCATGTGGATGC
	13-first half	Forward	GAAGGGTTTTCACAAGGTGTCTAC
		Reverse	GGATCATAGCCTAGCTTGGC
	13-second half	Forward	GGCTTCTGTTCTCATTCTCCTTC
		Reverse	GGATGTGGCTCACATGCC
	14	Forward	GCTTCACACTTGACCCTGG
		Reverse	GACATCCACCTCCATTCAGC
